# Supplementary material for: Viral expression and molecular profiling in liver tissue versus microdissected hepatocytes in hepatitis B virus - associated hepatocellular carcinoma
Source: Springer Nature journal article supplement (doi:10.1186/s12967-014-0230-1), 2014-08-20

**Figure S3**

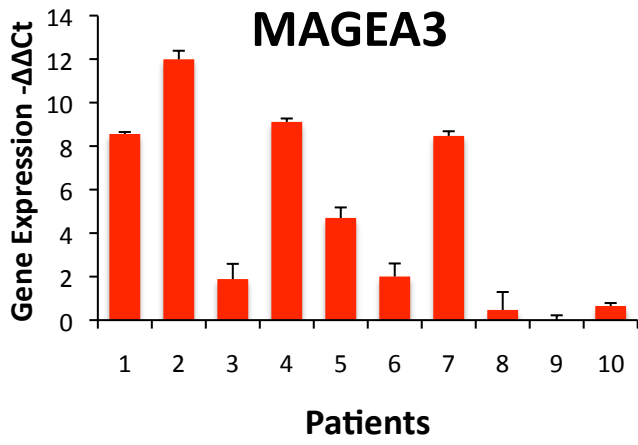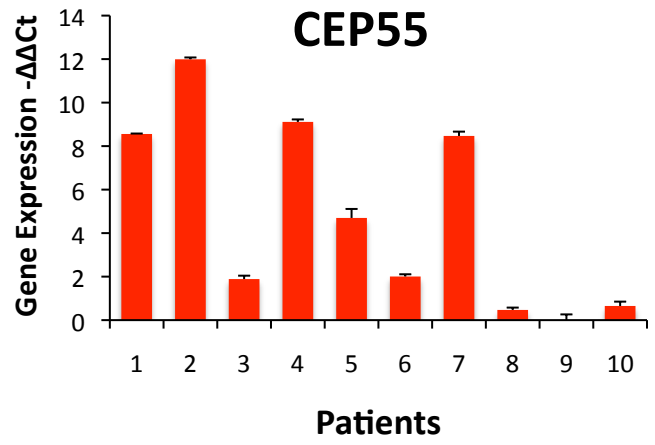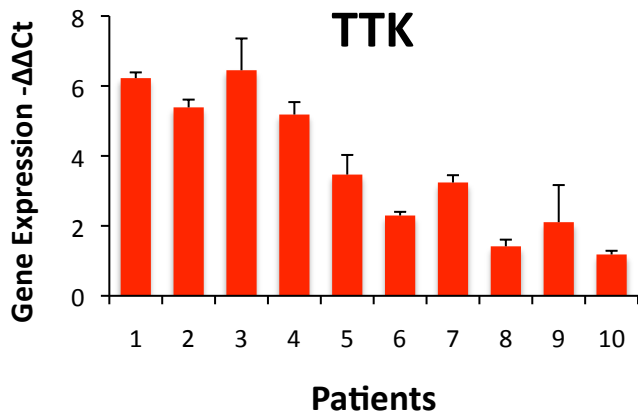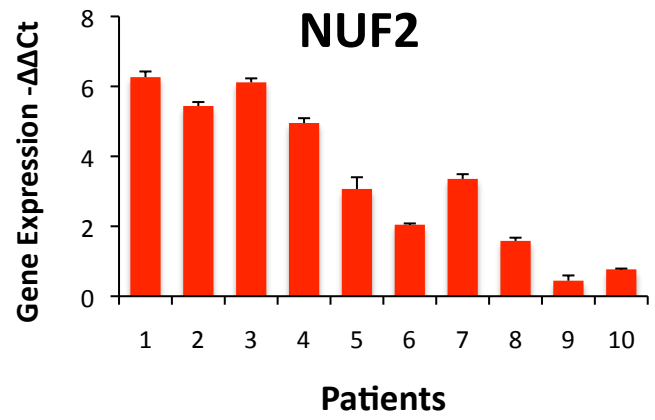

Supplement: MOESM9 [file 9766316]
